# Supplementary material
Source: PubMed Central journal article supplement (PMC3158153)
Supplement: 1107759108_pnas.201107759SI.pdf [file 1107759108_pnas.201107759SI.pdf]

# Supporting Information

Entringer et al. 10.1073/pnas.1107759108

**Table S1. Unadjusted and fully adjusted regression models predicting LTL (T/S ratio)**

|                                                                           | Unadjusted $\beta$ -regression coefficient (95% CI) |                                        |                                       | Adjusted $\beta$ -regression coefficient (95% CI) |                                        |                          |
|---------------------------------------------------------------------------|-----------------------------------------------------|----------------------------------------|---------------------------------------|---------------------------------------------------|----------------------------------------|--------------------------|
|                                                                           | Whole group                                         | Women                                  | Men                                   | Whole group                                       | Women                                  | Men                      |
| Prenatal stress exposure                                                  | -0.074* (-0.146 to -0.001)                          | -0.122 <sup>†</sup> (-0.205 to -0.039) | 0.070 (-0.075 to 0.214)               | -0.090* (-0.179 to -0.001)                        | -0.141 <sup>†</sup> (-0.240 to -0.041) | 0.122 (-0.135 to 0.379)  |
| Subject characteristics                                                   |                                                     |                                        |                                       |                                                   |                                        |                          |
| Age                                                                       | -0.004 (-0.012 to 0.005)                            | -0.004 (-0.014 to 0.005)               | -0.004 (-0.022 to 0.014)              | 0.004 (-0.009 to 0.017)                           | 0.000 (-0.014 to 0.014)                | -0.003 (-0.057 to 0.051) |
| BMI                                                                       | -0.001 (-0.011 to 0.008)                            | 0.000 (-0.011 to 0.011)                | -0.003 (-0.023 to 0.018)              | 0.000 (-0.012 to 0.012)                           | 0.002 (-0.011 to 0.016)                | -0.025 (-0.069 to 0.018) |
| Sex                                                                       | 0.074 <sup>†</sup> (-0.010 to 0.158)                | NA                                     | NA                                    | 0.070 (-0.041 to 0.181)                           | NA                                     | NA                       |
| Marker of intrauterine conditions over and above prenatal stress exposure |                                                     |                                        |                                       |                                                   |                                        |                          |
| Birth weight percentile                                                   | 0.002* (0.000 to 0.003)                             | 0.002* (0.000 to 0.004)                | 0.003 (-0.001 to 0.006)               | 0.002 <sup>†</sup> (0.001 to 0.004)               | 0.002 <sup>†</sup> (0.000 to 0.004)    | 0.004 (-0.003 to 0.011)  |
| Postnatal/ early life adversity                                           |                                                     |                                        |                                       |                                                   |                                        |                          |
| Early trauma                                                              | -0.031 (-0.109 to 0.046)                            | -0.051 (-0.140 to 0.039)               | 0.018 (-0.141 to 0.176)               | 0.004 (-0.088 to 0.096)                           | 0.005 (-0.095 to 0.105)                | -0.012 (-0.469 to 0.230) |
| Maternal care                                                             | -0.003 (-0.008 to 0.003)                            | -0.003 (-0.008 to 0.003)               | 0.009 (-0.003 to 0.020)               | -0.003 (-0.009 to 0.004)                          | -0.004 (-0.011 to 0.022)               | 0.004 (-0.027 to 0.036)  |
| Exposure to concurrent life stress                                        |                                                     |                                        |                                       |                                                   |                                        |                          |
| Chronic stress                                                            | -0.032 (-0.117 to 0.053)                            | -0.032 (-0.117 to 0.053)               | -0.108 <sup>†</sup> (-0.218 to 0.002) | 0.005 (-0.115 to 0.126)                           | 0.055 (-0.079 to 0.188)                | -0.106 (-0.415 to 0.204) |
| Depressive symptoms                                                       | -0.003 (-0.008 to 0.002)                            | 0.001 (-0.007 to 0.005)                | -0.006 (-0.014 to 0.002)              | -0.006 (-0.016 to 0.004)                          | -0.008 (-0.019 to 0.003)               | -0.004 (-0.031 to 0.023) |

\* $P \leq 0.05$ , <sup>†</sup> $P \leq 0.01$ , and  $P \leq 0.10$ .  $\beta$ , unstandardized regression coefficient.
